# Supplementary material for: A SERS active gold nanostar dimer for mercury ion detection
Source: Royal Society of Chemistry journal article supplement (doi:10.1039/c3cc39087j), 2013-01-01
Supplement: c3cc39087j.pdf [file c3cc39087j.pdf]

## Supporting information

### SERS Active Gold Nanostar Dimer for Mercury Ion Detection

## EXPERIMENTAL SECTIONS

### Material

Thiolated DNA oligonucleotides, purified by high performance liquid chromatography (HPLC), were manufactured by Shanghai Sangon Biological Engineering Technology & Services Co. Ltd. (Shanghai, P.R. China). These were dissolved in deionized (DI) water to give a final concentration of 100  $\mu\text{M}$ . Unless stated otherwise, all other chemicals used in this work were purchased from Sigma-Aldrich. DI water from a Milli-Q device (18.2 M  $\Omega$ , Millipore, Molsheim, France) was used in all experiments.  $\text{Cu}^{2+}$ ,  $\text{Hg}^{2+}$ ,  $\text{Cd}^{2+}$ ,  $\text{Pb}^{2+}$ ,  $\text{Cr}^{3+}$ ,  $\text{Mn}^{2+}$ ,  $\text{Co}^{2+}$ ,  $\text{Fe}^{3+}$ ,  $\text{Zn}^{2+}$ ,  $\text{Al}^{3+}$ ,  $\text{Mg}^{2+}$ , and  $\text{Ca}^{2+}$  (1000  $\mu\text{g mL}^{-1}$  in 1%  $\text{HNO}_3$  or 5%  $\text{HCL}$ ) were purchased from the National Institute of Metrology P.R China (Beijing, China).

The detailed sequences of the oligonucleotide are:

DNA 1: 5'-SH-AAAAAAGTGACCATTTTTGCAGTG-3'

DNA 2: 5'-SH-AAAAAACACTGCTTTTTTGGTCAC-3'

### Instrumentation

Transmission electron microscopy (TEM) images were obtained using a JEOL JEM-2100 operating at an acceleration voltage of 200 kV. The size distribution of the GNS was measured using a Zetasizer Nano ZS system (Malvern). A 633 nm laser was used for the DLS characterization. All UV-Vis spectra were acquired using a UNICO 2100 PC UV-Vis spectrophotometer and processed with Origin Lab software. Raman spectra were measured using a LabRam-HR800 Micro-Raman spectrometer with Lab-spec 5.0 software attached to a liquid cell. The slit and pinhole were set at 100 and 400  $\mu\text{m}$ , respectively, in the confocal configuration, with a holographic grating (600  $\text{g/mm}$ ) and an air-cooled He-Ne laser giving 785 nm excitation with a power of  $\sim 8$  mW.

## Gold Nanostar synthesis

Gold nanostars were synthesized by a seed-mediated growth method. Initially, the gold seed was prepared by adding 15 mL of 1% citrate solution to 100 mL of boiling 1 mM HAuCl<sub>4</sub> solution under vigorous stirring. After cooling to room temperature, 200 µL 1-2 mM AgNO<sub>3</sub> (for 50nm GNS is 1mM and 2 mM for 60 nm GNS) and 100 µL 0.1 M ascorbic acid were mixed together quickly into 20 mL of 0.25 mM HAuCl<sub>4</sub> with 200 µL seeds, the PH is kept at 3. The colloidal solution was resuspended into 0.05% tween-20 by centrifugation at 3000 rpm for 15 min to prevent further reaction.

## Preparation of ssDNA-Functionalized GNS

Briefly, 2 µL 100µM thiolated modified DNA 1 or DNA 2 solution was added to 100 µL of just prepared GNS and incubated for 3h at ambient temperature. Subsequently, 0.05 M NaCl was mixed and then the mixture was incubated for 12 h with constant shaking. The excess DNA was removed by two centrifugations at 3000 rpm for 10 min. The mixtures were denoted as GNS-DNA 1 and GNS-DNA 2.

## Synthesis of GNS dimer structure

To prepare 50 nm GNS dimers, 50 nm GNS-DNA 1 and GNS-DNA 2 were mixed with a ratio of 1:1. A similar procedure was used for the 60 nm GNS dimer. The heterodimers were formed by adding equal quantities of 50 nm GNS-DNA 1 to 60 nm GNS-DNA 2. Then, 4-ATP ethanol solution, with a final concentration of 1 µM, was added to all three mixtures and incubated at room temperature overnight. After redispersion in DI water, Hg<sup>2+</sup> solution, with a final concentration 1 ng mL<sup>-1</sup>, was mixed with all three samples and shaken for 3 h.

## Fabrication of GNS sensors

800 µL 60 nm GNS-DNA 1 and GNS-DNA 2 in the ratio of 1:1 were mixed with 1 µM 4-ATP ethanol solution and incubated for 12 h with constant shaking. This mixture is denoted as the sensor solution. Samples inoculated with different concentrations of Hg<sup>2+</sup> (0, 0.5, 0.1, 0.05, 0.01,

58 0.005, 0.002 ng mL<sup>-1</sup>) were separately added to 100 µL of sensor solution in separate tubes. After  
59 reacting for 3 h, the samples were processed by TEM, UV-Visible spectrophotometry and SERS.  
60  
61

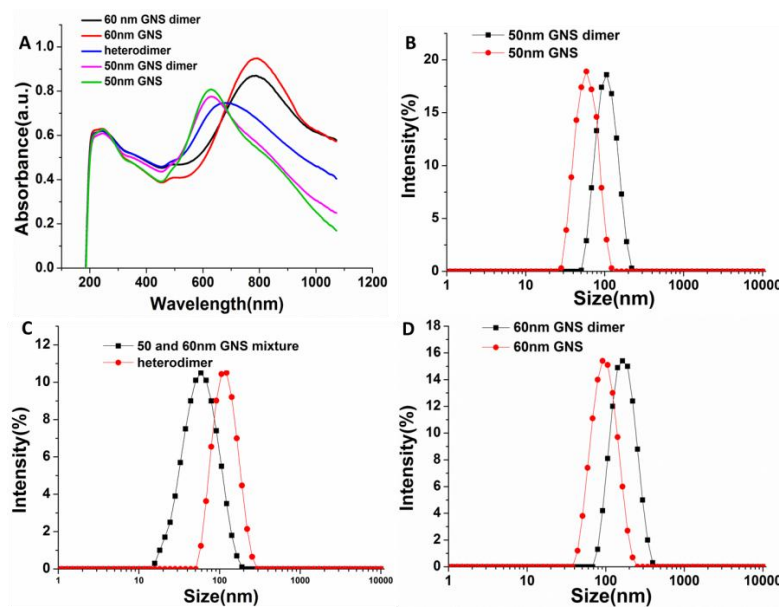

62  
63 **Figure S1.** Uv-vis spectrum of different GNS dimers and particles (A), DLS of 50,  
64 heterodimer, 60 nm GNS sensor before and after addition 1 ng mL<sup>-1</sup> Hg<sup>2+</sup> (B, C, D).  
65  
66  
67  
68

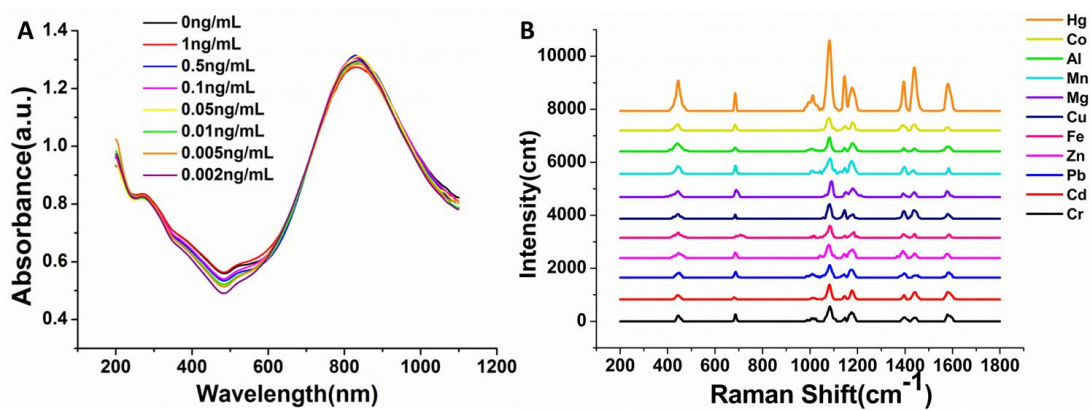

69  
70 **Figure S2.** Uv-vis spectrum of 60 nm GNS dimer sensors in diverse Hg<sup>2+</sup> samples (A),  
71 SERS intensity of different heavy metal ions based on 60 nm GNS dimer sensor (B)  
72

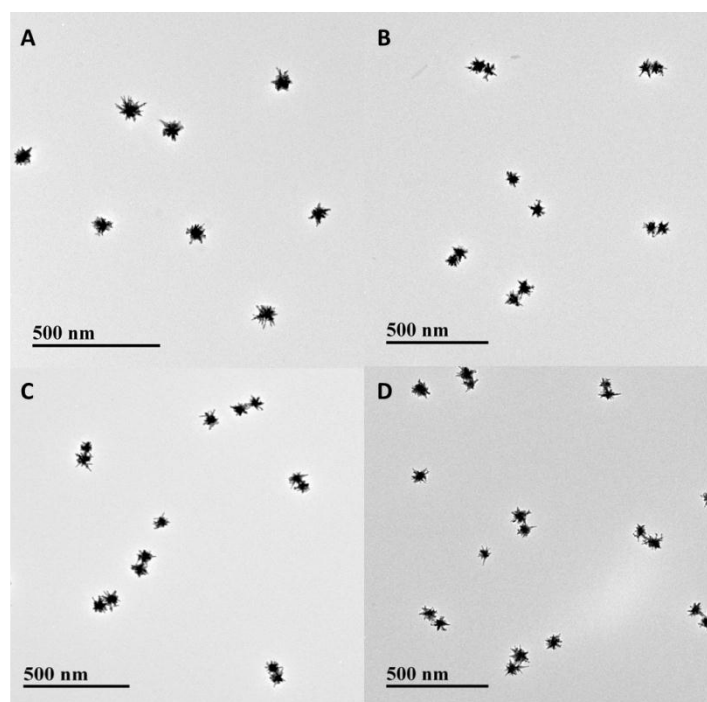

**Figure S3.** Lower magnification images of GNS dimer sensor with different Hg<sup>2+</sup> addition  
(A) 0 ng mL<sup>-1</sup>, (B) 0.005 ng mL<sup>-1</sup>, (C) 0.01 ng mL<sup>-1</sup>, (D) 0.05 ng mL<sup>-1</sup>
